# Supplementary material for: Immune Monitoring Reveals Fusion Peptide Priming to Imprint Cross-Clade HIV-Neutralizing Responses with a Characteristic Early B Cell Signature
Source: PubMed Central journal article supplement — Cell Rep. Author manuscript; Available in PMC 2024 May 7. (PMC11075050; doi:10.1016/j.celrep.2020.107981), 2020-08-04
Supplement: NIHMS1987354-supplement-Supplements.pdf [file NIHMS1987354-supplement-Supplements.pdf]

## Supplemental Information

### Immune Monitoring Reveals Fusion Peptide

### Priming to Imprint Cross-Clade HIV-Neutralizing

### Responses with a Characteristic Early B Cell Signature

Cheng Cheng, Hongying Duan, Kai Xu, Gwo-Yu Chuang, Angela R. Corrigan, Hui Geng, Sijy O'Dell, Li Ou, Michael Chambers, Anita Changela, Xuejun Chen, Kathryn E. Foulds, Edward K. Sarfo, Alexander J. Jafari, Kurt R. Hill, Rui Kong, Kevin Liu, John P. Todd, Yaroslav Tsybovsky, Raffaello Verardi, Shuishu Wang, Yiran Wang, Winston Wu, Tongqing Zhou, VRC Production Program, Frank J. Arnold, Nicole A. Doria-Rose, Richard A. Koup, Adrian B. McDermott, Diana G. Scorpio, Michael Worobey, Lawrence Shapiro, John R. Mascola, and Peter D. Kwong

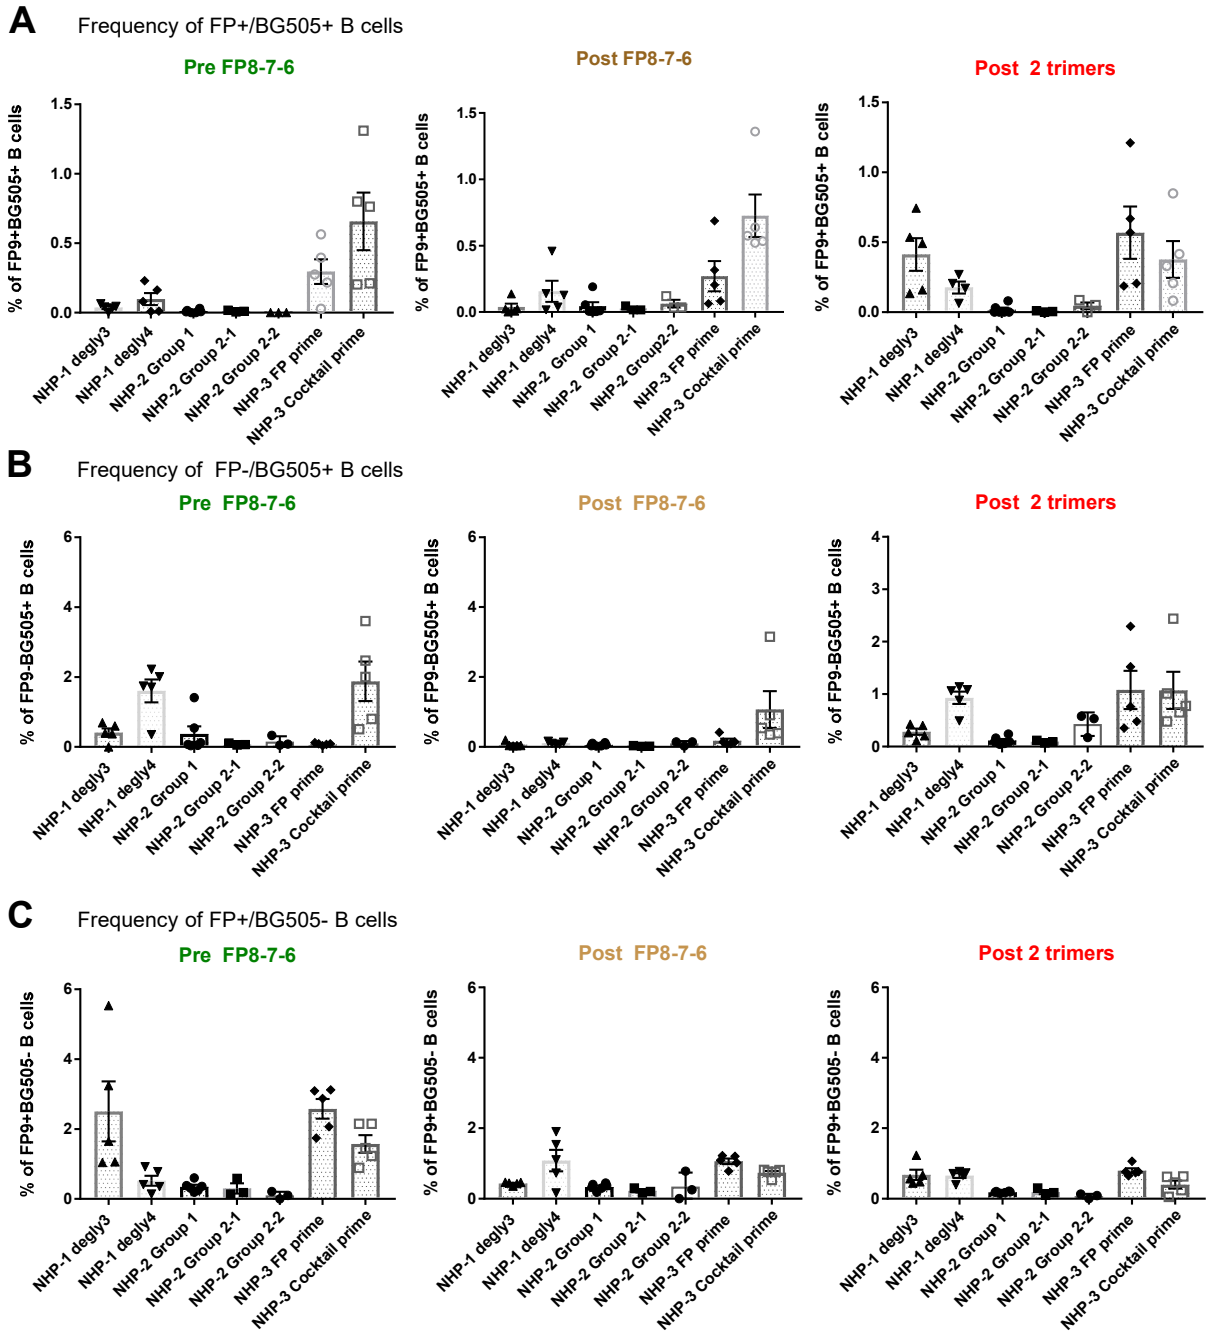

**Figure S1. Frequency of Antigen Specific B Cells at Three Key Time Points, Related to Figures 2-5.** Antigen specific B cell population among IgG+ B cells were characterized as dual FP+/BG505+ (A), single BG505+ (B), or single FP+ (C) at pre FP8-7-6, post FP8-7-6 and post 2 trimers time points. B cell frequencies were calculated as mean  $\pm$  SEM.

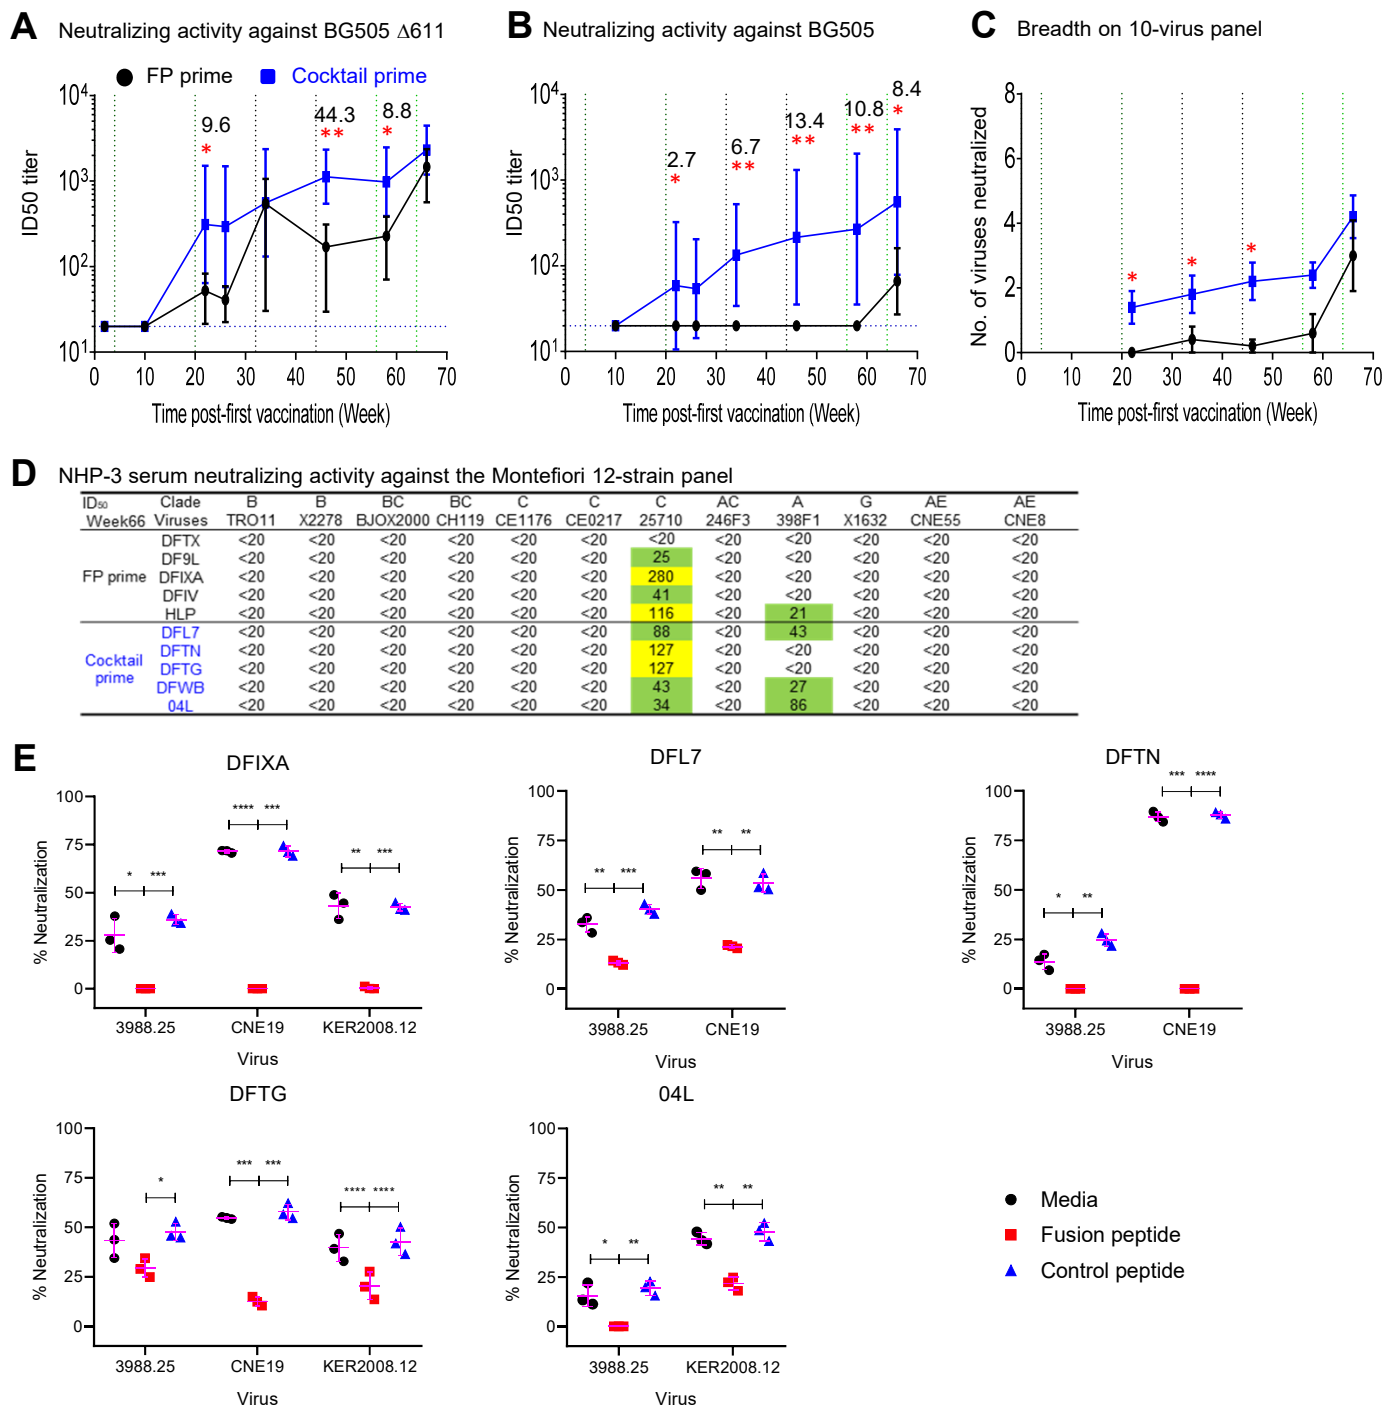

**Figure S2. Cocktail-Prime Elicits Earlier and More Potent Responses than FP-Only Prime, with Both Eliciting Responses Directed Against FP, Related to Figures 4 and 5.** (A-C) Cocktail-primed NHPs show earlier plasma neutralization activity with higher potency and breadth than FP-primed group in NHP-3 study. (A) Neutralization ID<sub>50</sub> against BG505  $\Delta$ 611. (B) Neutralization ID<sub>50</sub> against wild-type BG505. (C) Neutralization breadth on a 10-strain panel of wild-type viruses. Data shown represent geometric mean $\pm$ 95% CI for panels (A) and (B) and mean $\pm$ SEM for (C), with p values calculated with Mann-Whitney 2-tailed t test. Numbers on panels (A) and (B) indicate the ratio of GMT titers between cocktail-primed and FP-primed groups. ID<sub>50</sub> values of <20 were treated as 20. (D) Neutralization IC<sub>50</sub> of NHP-3 sera at week 66 on the Montefiori 12-strain panel (deCamp et al., 2014). (E) FP competition reveals plasma neutralizing activity against heterologous viruses to be directed against FP. Percent plasma neutralization by plasma from NHPs DFIXA (FP prime), and DFL7, DFTN, DFTG, and 04L (cocktail prime) in NHP-3 study at week 66 were assessed in media (control), fusion peptide + media (FP), and control peptide + media (non-FP control). Plasma samples were diluted 20-fold. Each data point represents an independent assay, and mean and standard deviation indicated by red bars. P values were calculated with paired parametric two-tailed t test. \*: p<0.05, \*\*: p<0.01, \*\*\*: p<0.001, \*\*\*\*: p<0.0001.

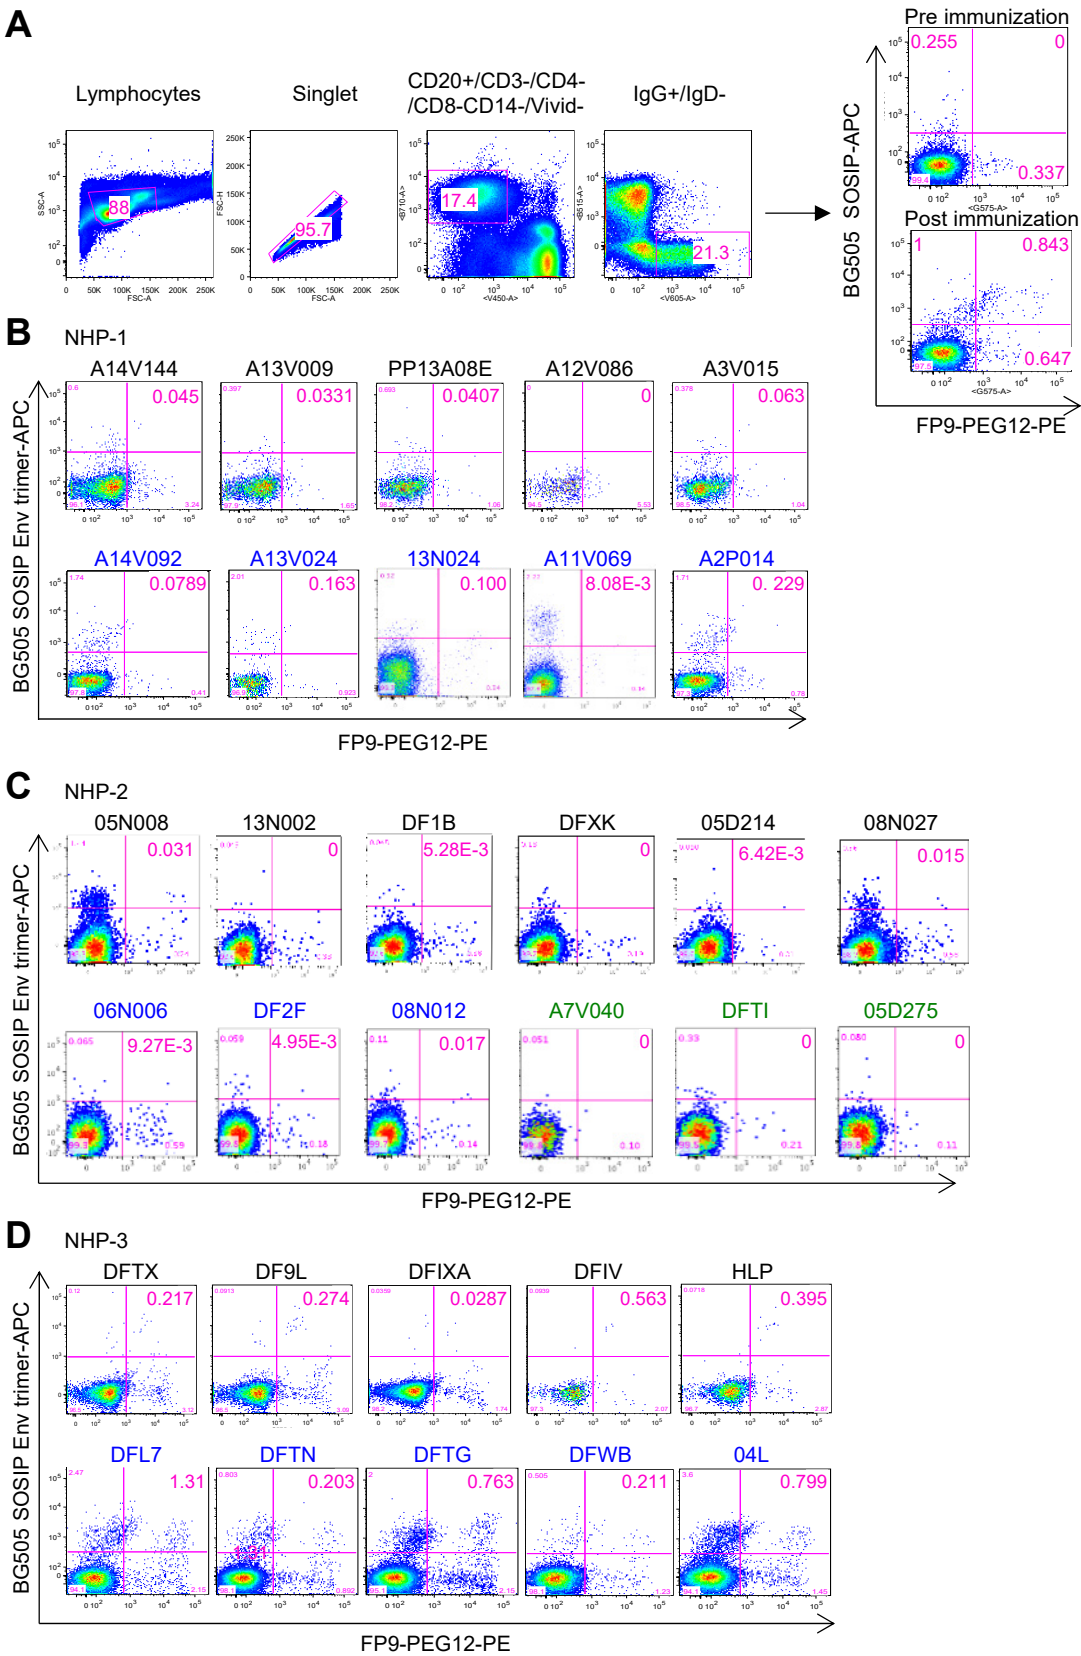

**Figure S3. FACS Analysis of PBMCs at the Pre FP8-7-6 Time Point, Related to Figures 2-6.** (A) Gating strategy for FP+BG505+ memory B cells in naïve and immunized PBMCs. PBMCs from the pre immunization time points were used as a control to set up gating for the antigen-specific B cells. (B-D) FACS analysis of PBMCs. NHP IDs were colored in the same pattern as in Figures 2-4. Pseudocolor graphs are shown for IgG+ B cells gated with the two probes based on gating setups using PBMCs from each monkey at pre vaccination as the control.

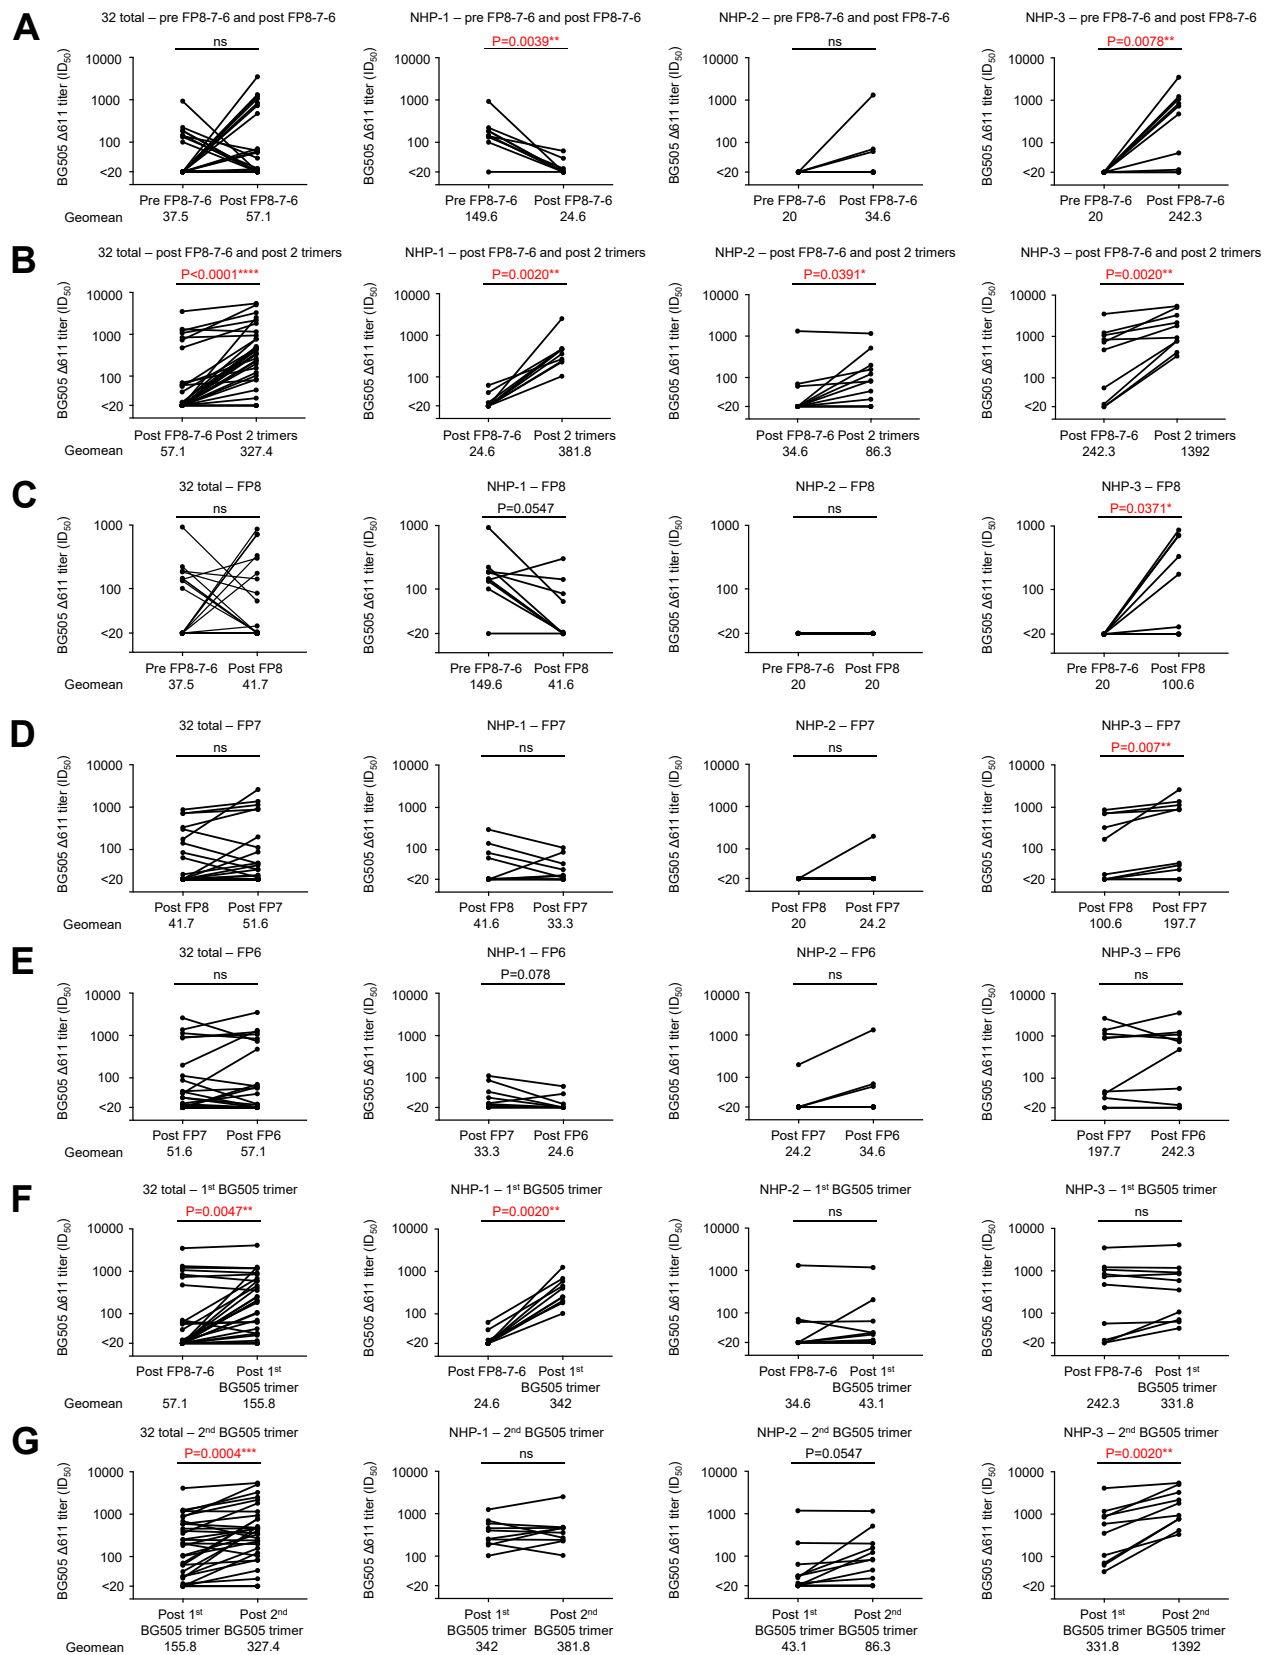

**Figure S4. Comparison of BG505  $\Delta$ 611 Titers ( $ID_{50}$ ) Before and After Each Immunization in the FP8-7-6-Trimer-Trimer Boosting Module, Related to Figures 2-4.** Impact of FP and trimer boosts on neutralization activity was evaluated by comparing BG505  $\Delta$ 611 titers ( $ID_{50}$ ) before and after (A) FP8-7-6-KLH boost and (B) two rounds of BG505 DS SOSIP boosting. Neutralization responses were further broken down by comparing BG505  $\Delta$ 611 titers before and after boosting with each immunogen: FP8-KLH (C), FP7-KLH (D), FP6-KLH (E), BG505 DS SOSIP (F), and second round of BG505 DS-SOSIP (G). Responses are pooled for 32 NHPs and divided into NHP studies NHP-1, NHP-2 and NHP-3, in that order from left to right. P values were calculated with 2-tailed non-parametric Wilcoxon matched pairs signed rank test, \*:  $p<0.05$ ; \*\*:  $p<0.01$ ; \*\*\*:  $p<0.001$ ; \*\*\*\*:  $p<0.0001$ .

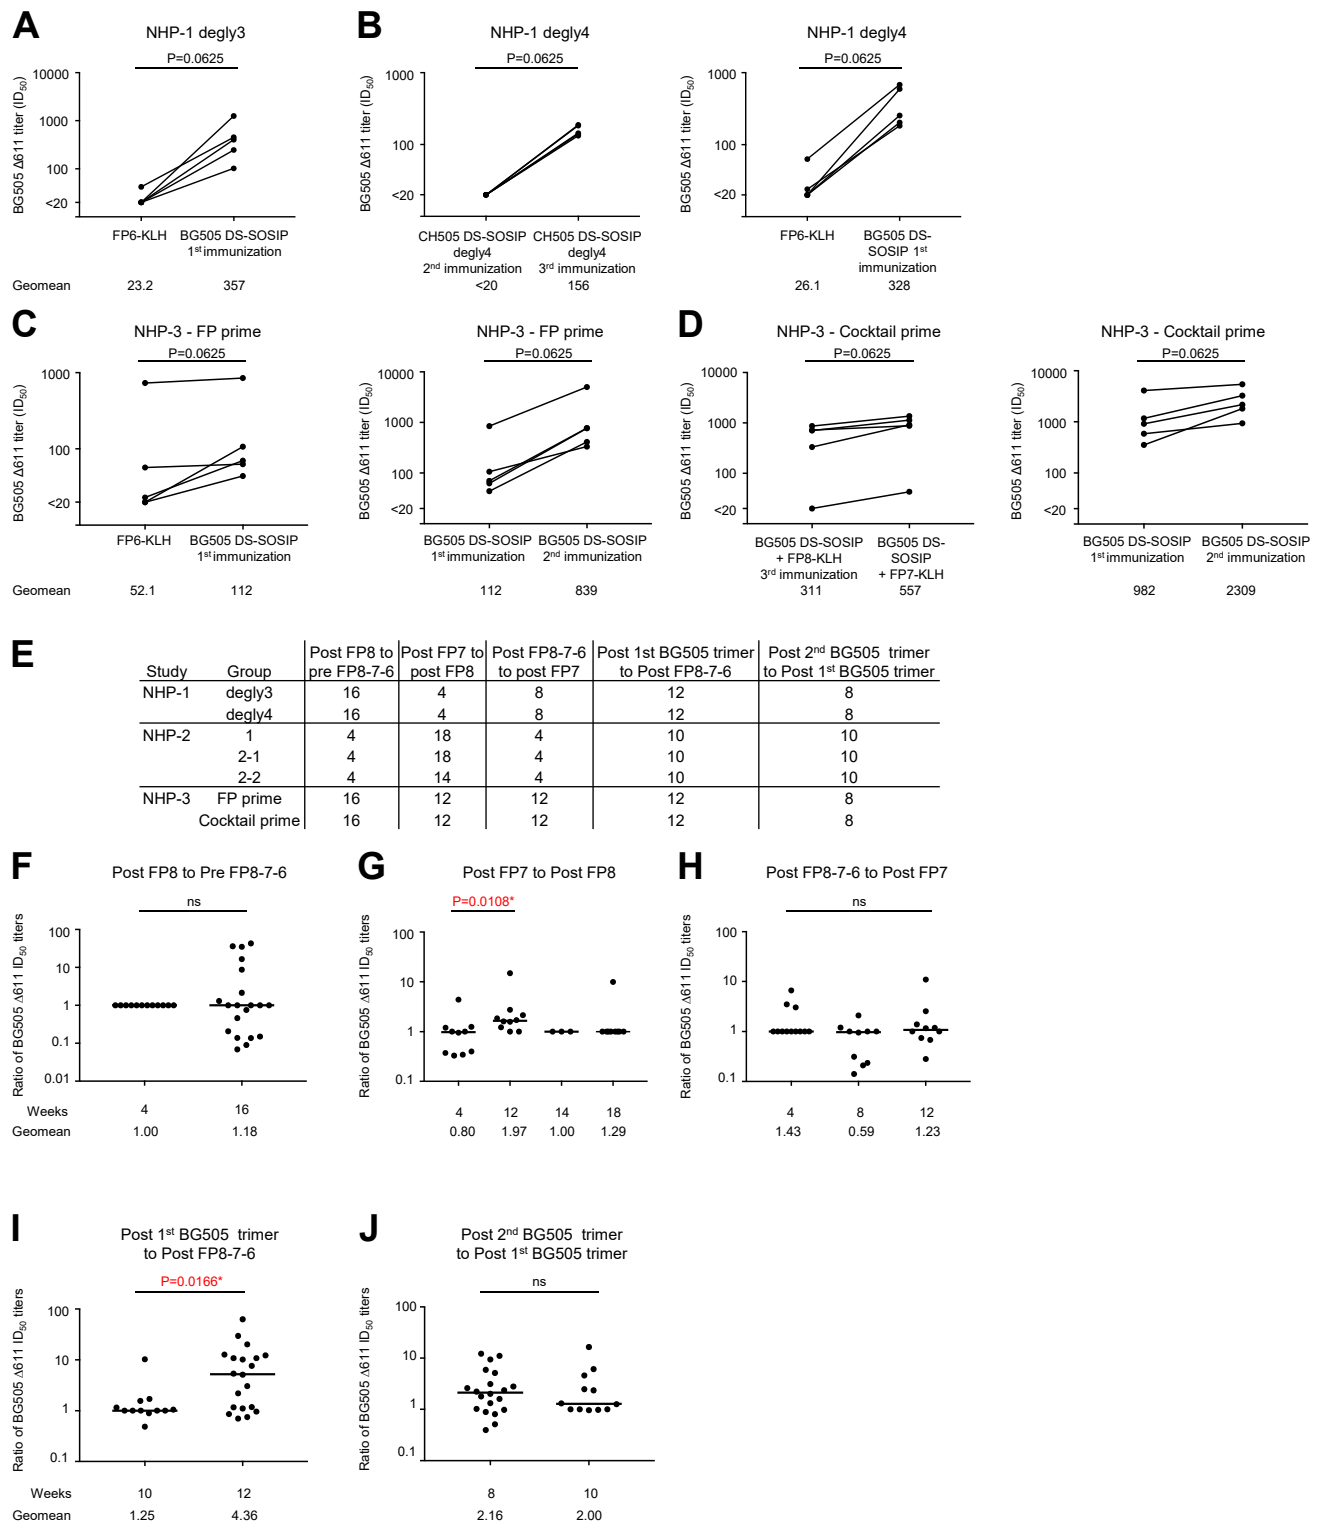

**Figure S5. Impact of Variations in Immunogens and Time Intervals on BG505  $\Delta$ 611 Neutralization Titers ( $ID_{50}$ ), Related to Figures 2 and 4.** Immunizations with statistically significant changes to BG505  $\Delta$ 611 titers ( $ID_{50}$ ) were observed for groups (A) NHP-1 degly3; (B) NHP-1 degly4; (C) NHP-3 FP prime; (D) NHP-3 Cocktail prime. P values were calculated with 2-tailed non-parametric Wilcoxon matched pairs signed rank test. Note that the minimum p value for a sample size of 5 is 0.0625; since all samples show an increase between the first and second values, all are statistically equivalent and equal with  $p = 0.0625$ . (E) Summary of time intervals in weeks for study groups. Impact of immunization time interval on neutralization activity was evaluated by examining the ratio of BG505  $\Delta$ 611 titers ( $ID_{50}$ ) from (F) post FP8 to pre FP8-7-6, (G) post FP7 to post FP8, (H) post FP8-7-6 to post FP7, (I) post 1<sup>st</sup> BG505 trimer to post FP8-7-6, and (J) post 2<sup>nd</sup> BG505 trimer to post 1<sup>st</sup> BG505 trimer. P values were calculated with 2-tailed, non-parametric Mann-Whitney test with the exception of the lower two panels in (K) and (L) which were calculated with non-parametric Kruskal-Willis test, \*:  $p < 0.05$ ; \*\*:  $p < 0.01$ ; \*\*\*:  $p < 0.001$ ; \*\*\*\*:  $p < 0.0001$ .

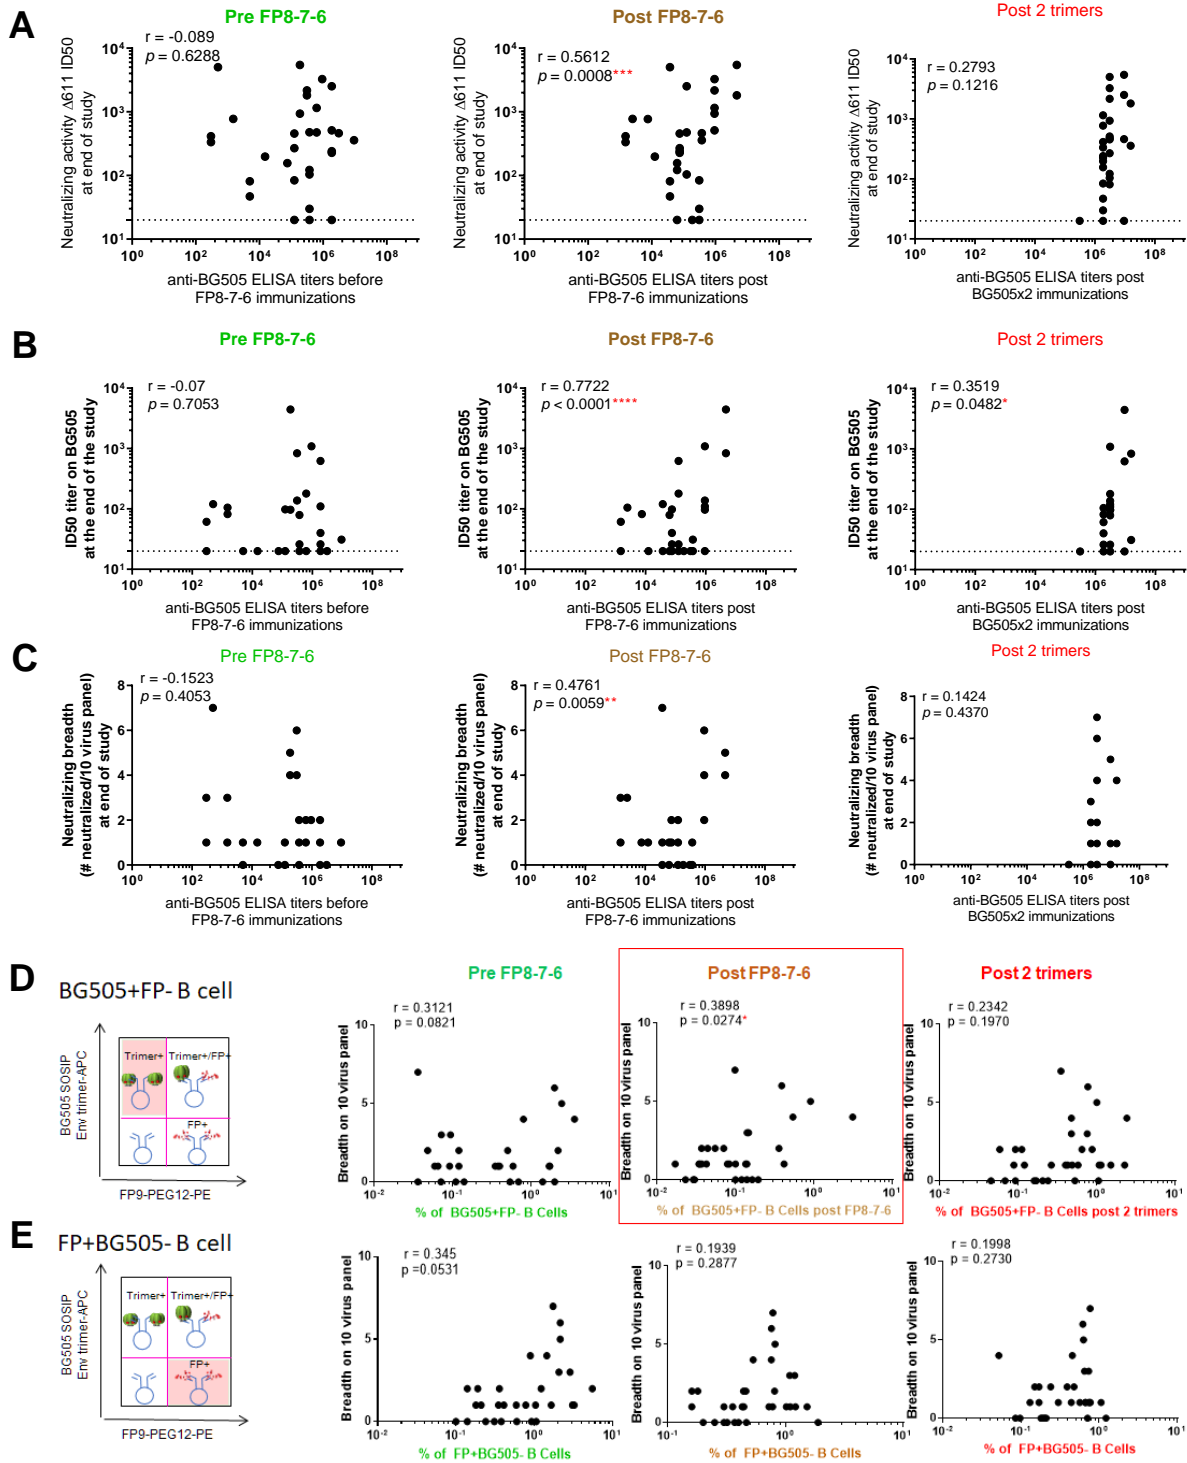

**Figure S6. Correlation of Anti-BG505 ELISA Titer or Single-Positive B Cell Frequency with Vaccine Outcome, Related to Figures 2-6.** Correlation of anti-BG505 ELISA endpoint titers at pre-FP8-7-6, post FP8-7-6 and post 2 trimer boost with neutralizing activity against BG505  $\Delta 611$  (A), BG505 (B) or 10 virus panel (C) at the end of the study. Correlation of single-positive B cell frequency, BG505+FP9- (D) and FP9+/BG505- (E), at pre-FP8-7-6, post FP8-7-6 and post 2 trimer boost with neutralizing breadth at the end of the study.  $r$  and  $p$  values were calculated with 2-tailed Pearson coefficient analysis, \*:  $p < 0.05$ , \*\*:  $p < 0.01$ , \*\*\*:  $p < 0.001$ , \*\*\*\*:  $p < 0.0001$ .





**Table S2. Immunization with CH505 FP-Deglycan Variants (NHP-1 Study) Elicited Immune Responses Against the FP Site but Failed To Neutralize Wild-Type BG505 or CH505 Viruses, Related to Figure 2.** Neutralizing activity against BG505 and its mutants, or CH505 virus post two (week6) or three (week18) trimer immunizations was shown as ID<sub>50</sub>.

| ID <sub>50</sub> |                                      | Virus     | BG505.W6M.C2.SG3 |       | BG505.W6M.C2.N88Q.SG3 |       | BG505.W6M.C2.N611Q.SG3 |       | BG505.W6M.C2.N88Q.N611Q.SG3 |       | CH0505s.T/F.SG3 |       |
|------------------|--------------------------------------|-----------|------------------|-------|-----------------------|-------|------------------------|-------|-----------------------------|-------|-----------------|-------|
| Group            | Vaccine                              | Animal ID | wk 6             | wk 18 | wk 6                  | wk 18 | wk 6                   | wk 18 | wk 6                        | wk 18 | wk 6            | wk 18 |
| 1                | Week 0, 4, 16: CH505 DS-SOSIP degly3 | A14V144   | <20              | <20   | <20                   | <20   | <20                    | 930   | <20                         | 3,091 | <20             | <20   |
|                  |                                      | A13V009   | <20              | <20   | <20                   | <20   | <20                    | <20   | <20                         | 75    | <20             | <20   |
|                  |                                      | PP13A08E  | <20              | <20   | <20                   | <20   | <20                    | 222   | <20                         | 727   | <20             | 70    |
|                  |                                      | A12V086   | <20              | <20   | <20                   | <20   | <20                    | 145   | <20                         | 329   | <20             | <20   |
|                  |                                      | A3V015    | <20              | <20   | <20                   | <20   | <20                    | 101   | <20                         | 152   | <20             | 58    |
| 2                | Week 0, 4, 16: CH505 DS-SOSIP degly4 | A14V092   | <20              | <20   | <20                   | <20   | <20                    | 133   | <20                         | 446   | <20             | <20   |
|                  |                                      | A13V024   | <20              | <20   | <20                   | <20   | <20                    | 188   | <20                         | 715   | <20             | <20   |
|                  |                                      | 13N024    | <20              | <20   | <20                   | <20   | <20                    | 144   | <20                         | 594   | <20             | 25    |
|                  |                                      | A11V069   | <20              | <20   | <20                   | <20   | <20                    | 140   | <20                         | 244   | <20             | <20   |
|                  |                                      | A2P014    | <20              | <20   | <20                   | <20   | <20                    | 184   | <20                         | 676   | <20             | <20   |

**Table S3. Priming with CD4bs-Deglycan Immunogen Elicited CD4bs-Directed Neutralizing Activity Against CH505 CD4bs-degly4 Virus, but Generated Minimum Neutralizing Activity Against CH505 and Other Wild-Type Viruses (NHP-2 Study), Related to Figure 3.** Serum neutralizing activity (ID<sub>50</sub>) against BG505 and its glycan mutants, CH505 and its glycan mutants, and three other clade C viruses are shown at weeks 10 and 18.

| ID50<br>Virus | Clade A           |       |                                 |       |                         |       |                          |       |                               |       | Clade C      |       |                |       |                 |       |                    |        |              |       |
|---------------|-------------------|-------|---------------------------------|-------|-------------------------|-------|--------------------------|-------|-------------------------------|-------|--------------|-------|----------------|-------|-----------------|-------|--------------------|--------|--------------|-------|
|               | BG505.W6M.C.2.SG3 |       | BG505.W6M.C.2.C.D4bs degly4.SG3 |       | BG505.W6M.C.2.N.88Q.SG3 |       | BG505.W6M.C.2.N.611Q.SG3 |       | BG505.W6M.C.2.N.88Q.N611Q.SG3 |       | BI369.9A.SG3 |       | 96ZM651.02.SG3 |       | CH0505s.T/F.SG3 |       | CH505 CD4bs degly4 |        | MW965.26.SG3 |       |
|               | wk 10             | wk 18 | wk 10                           | wk 18 | wk 10                   | wk 18 | wk 10                    | wk 18 | wk 10                         | wk 18 | wk 10        | wk 18 | wk 10          | wk 18 | wk 10           | wk 18 | wk 10              | wk 18  | wk 10        | wk 18 |
| 05N008        | <20               | <20   | <20                             | <20   | <20                     | <20   | <20                      | <20   | <20                           | <20   | <20          | <20   | <20            | <20   | <20             | <20   | 9,515              | 65,254 | <20          | 93    |
| 13N002        | <20               | <20   | <20                             | 27    | <20                     | <20   | <20                      | <20   | <20                           | <20   | <20          | <20   | <20            | <20   | <20             | <20   | 1,480              | 7,727  | <20          | 50    |
| DF1B          | <20               | <20   | <20                             | <20   | <20                     | <20   | <20                      | <20   | <20                           | <20   | <20          | <20   | <20            | <20   | <20             | <20   | 1,190              | 29,885 | 31           | 32    |
| DFXK          | <20               | <20   | <20                             | 71    | <20                     | <20   | <20                      | <20   | <20                           | <20   | <20          | <20   | <20            | <20   | <20             | <20   | 653                | 18,038 | <20          | <20   |
| 05D214        | <20               | <20   | <20                             | 52    | <20                     | <20   | <20                      | <20   | <20                           | <20   | <20          | <20   | <20            | <20   | <20             | <20   | 32                 | 8,300  | <20          | <20   |
| 08N027        | <20               | <20   | <20                             | <20   | <20                     | <20   | <20                      | <20   | <20                           | <20   | <20          | <20   | <20            | <20   | <20             | <20   | 71                 | 6,783  | <20          | <20   |
| 06N006        | <20               | <20   | <20                             | <20   | <20                     | <20   | <20                      | <20   | 117                           | <20   | <20          | <20   | <20            | <20   | <20             | <20   | 45                 | 16,236 | <20          | 20    |
| DF2F          | <20               | <20   | <20                             | <20   | <20                     | <20   | <20                      | <20   | 227                           | <20   | <20          | <20   | <20            | <20   | <20             | <20   | <20                | 3,250  | <20          | 127   |
| 08N012        | <20               | <20   | <20                             | <20   | <20                     | <20   | <20                      | <20   | <20                           | <20   | <20          | <20   | <20            | <20   | <20             | <20   | <20                | 33,548 | <20          | 74    |
| A7V040        | <20               | <20   | <20                             | <20   | <20                     | <20   | <20                      | <20   | <20                           | <20   | <20          | <20   | <20            | <20   | <20             | <20   | 896                | 569    | <20          | <20   |
| DFTI          | <20               | <20   | <20                             | <20   | <20                     | <20   | <20                      | <20   | <20                           | <20   | <20          | <20   | <20            | <20   | <20             | <20   | 189                | 407    | <20          | <20   |
| 05D275        | <20               | <20   | <20                             | <20   | <20                     | <20   | <20                      | <20   | <20                           | <20   | <20          | <20   | <20            | <20   | <20             | <20   | 177                | 326    | <20          | <20   |

**Table S4. Neutralization Titers of FP-Primed and Cocktail-Primed Groups Against BG505 Δ611, BG505 WT and 10-Strain Virus Panel at Various Time Points (NHP-3), Related to Figures 4 and 5.**

(A) Neutralization titers against BG505 Δ611 and BG505 WT at various time points. NHPs with week 66 plasma tested in FP competition assay are highlighted in red letters.

| ID <sub>50</sub> on BG505.Δ611 | Animal ID. | wk 10 | wk 22 | wk 26 | wk 34 | wk 46 | wk 54 | wk 58 | wk 62 | wk 66 |
|--------------------------------|------------|-------|-------|-------|-------|-------|-------|-------|-------|-------|
| FP prime                       | DFTX       | <20   | 26    | 30    | 48    | 57    | 20    | 63    | 31    | 770   |
|                                | DF9L       | <20   | <20   | <20   | <20   | <20   | <20   | 107   | 35    | 334   |
|                                | DFIXA      | <20   | 175   | 114   | 2,605 | 732   | 116   | 851   | 925   | 5,037 |
|                                | DFIV       | <20   | <20   | <20   | <20   | <20   | <20   | 44    | <20   | 414   |
|                                | HLP        | <20   | <20   | <20   | 34    | 23    | <20   | 70    | 48    | 775   |
| Cocktail prime                 | DFL7       | <20   | 866   | 1,633 | 1,371 | 3,493 | 931   | 4,120 | 2,808 | 5,459 |
|                                | DFTN       | <20   | 704   | 393   | 1,132 | 841   | 91    | 586   | 403   | 936   |
|                                | DFTG       | <20   | 332   | 335   | 914   | 1,067 | 429   | 914   | 1,805 | 2,164 |
|                                | DFWB       | <20   | 721   | 509   | 879   | 1,222 | 212   | 1,170 | 758   | 3,267 |
|                                | 04L        | <20   | <20   | <20   | 43    | 474   | 43    | 354   | 353   | 1,816 |

  

| ID <sub>50</sub> on BG505 | Animal ID. | wk 10 | wk 22 | wk 26 | wk 34 | wk 46 | wk 54 | wk 58 | wk 62 | wk 66 |
|---------------------------|------------|-------|-------|-------|-------|-------|-------|-------|-------|-------|
| FP prime                  | DFTX       | <20   | <20   | <20   | <20   | <20   | <20   | <20   | <20   | 82    |
|                           | DF9L       | <20   | <20   | <20   | <20   | <20   | <20   | <20   | <20   | <20   |
|                           | DFIXA      | <20   | <20   | <20   | <20   | <20   | <20   | <20   | 25    | 120   |
|                           | DFIV       | <20   | <20   | <20   | <20   | <20   | <20   | <20   | <20   | 61    |
|                           | HLP        | <20   | <20   | <20   | <20   | <20   | <20   | <20   | <20   | 105   |
| Cocktail prime            | DFL7       | <20   | 125   | 104   | 550   | 1,208 | 366   | 1,889 | 1,530 | 4,428 |
|                           | DFTN       | <20   | <20   | 25    | 53    | 36    | <20   | 35    | 35    | 97    |
|                           | DFTG       | <20   | 30    | 35    | 75    | 72    | <20   | 80    | 59    | 138   |
|                           | DFWB       | <20   | 463   | 254   | 347   | 606   | 89    | 787   | 305   | 1,085 |
|                           | 04L        | <20   | <20   | <20   | 56    | 247   | 22    | 334   | 180   | 835   |

(B) ID<sub>50</sub> on 10 strain panel at various time points after 1st immunization.

| Virus  | Clade A         |       |       |       | Clade AE            |       |       |       | Clade BC    |       |       |       | Clade C     |       |       |       | Clade A        |       |       |       | Clade A    |       |       |       | Clade B     |       |       |       | Clade B     |       |       |       | Clade C         |       |       |       | Clade C    |       |       |       |       |       |       |       |       |
|--------|-----------------|-------|-------|-------|---------------------|-------|-------|-------|-------------|-------|-------|-------|-------------|-------|-------|-------|----------------|-------|-------|-------|------------|-------|-------|-------|-------------|-------|-------|-------|-------------|-------|-------|-------|-----------------|-------|-------|-------|------------|-------|-------|-------|-------|-------|-------|-------|-------|
|        | BG505.WM.C2.SG3 |       |       |       | CNE56               |       |       |       | CNE19       |       |       |       | 25710-2.43  |       |       |       | KER2008.12.SG3 |       |       |       | Q23.17.SG3 |       |       |       | 3988.25.SG3 |       |       |       | BL01.DG.SG3 |       |       |       | 0077.V1.C16.SG3 |       |       |       | 286.38.SG3 |       |       |       |       |       |       |       |       |
| glycan | missing 241     |       |       |       | Missing 241 and 611 |       |       |       | Missing 448 |       |       |       | Missing 241 |       |       |       | Complete       |       |       |       | Complete   |       |       |       | Complete    |       |       |       | Complete    |       |       |       | Missing 241     |       |       |       | Complete   |       |       |       |       |       |       |       |       |
| Week   | Wk 22           | Wk 34 | Wk 46 | Wk 58 | Wk 66               | Wk 22 | Wk 34 | Wk 46 | Wk 58       | Wk 66 | Wk 22 | Wk 34 | Wk 46       | Wk 58 | Wk 66 | Wk 22 | Wk 34          | Wk 46 | Wk 58 | Wk 66 | Wk 22      | Wk 34 | Wk 46 | Wk 58 | Wk 66       | Wk 22 | Wk 34 | Wk 46 | Wk 58       | Wk 66 | Wk 22 | Wk 34 | Wk 46           | Wk 58 | Wk 66 | Wk 22 | Wk 34      | Wk 46 | Wk 58 | Wk 66 | Wk 22 | Wk 34 | Wk 46 | Wk 58 | Wk 66 |
| DFTX   | <20             | <20   | <20   | <20   | 82                  | <20   | <20   | <20   | <20         | <20   | <20   | <20   | <20         | <20   | <20   | <20   | <20            | <20   | <20   | <20   | <20        | <20   | <20   | <20   | <20         | <20   | <20   | <20   | <20         | <20   | <20   | <20   | <20             | <20   | <20   | <20   | <20        | <20   | <20   | <20   |       |       |       |       |       |
| DF9L   | <20             | <20   | <20   | <20   | <20                 | <20   | <20   | <20   | <20         | <20   | <20   | <20   | <20         | 25    | <20   | <20   | <20            | <20   | <20   | <20   | <20        | <20   | <20   | <20   | <20         | <20   | <20   | <20   | <20         | <20   | <20   | <20   | <20             | <20   | <20   | <20   | <20        | <20   | <20   |       |       |       |       |       |       |
| DFIXA  | <20             | <20   | <20   | 120   | <20                 | <20   | <20   | <20   | <20         | <20   | 53    | <20   | 31          | 115   | <20   | 81    | 66             | 39    | 280   | <20   | <20        | <20   | 20    | 39    | <20         | <20   | <20   | <20   | <20         | <20   | <20   | <20   | <20             | 83    | <20   | <20   | <20        | <20   | 36    | <20   | <20   | <20   | <20   | 30    |       |
| DFIV   | <20             | <20   | <20   | 61    | <20                 | <20   | <20   | <20   | <20         | <20   | <20   | <20   | <20         | 41    | <20   | <20   | <20            | <20   | <20   | <20   | <20        | <20   | <20   | <20   | <20         | <20   | <20   | <20   | 21          | <20   | <20   | <20   | <20             | <20   | <20   | <20   | <20        | <20   | <20   |       |       |       |       |       |       |
| HLP    | <20             | <20   | <20   | <20   | 105                 | <20   | <20   | <20   | <20         | <20   | <20   | <20   | <20         | <20   | 116   | <20   | <20            | <20   | <20   | <20   | <20        | <20   | <20   | <20   | <20         | <20   | <20   | <20   | <20         | 27    | <20   | <20   | <20             | <20   | <20   | <20   | <20        | <20   | <20   | <20   |       |       |       |       |       |
| DFL7   | 125             | 550   | 1,208 | 1,889 | 4,428               | <20   | <20   | <20   | <20         | <20   | <20   | <20   | <20         | 49    | <20   | <20   | 68             | 59    | 88    | <20   | <20        | <20   | <20   | <20   | <20         | <20   | <20   | 45    | 59          | 88    | <20   | <20   | <20             | 45    | <20   | <20   | <20        | <20   | <20   |       |       |       |       |       |       |
| DFTN   | <20             | 53    | 36    | 35    | 97                  | <20   | <20   | <20   | <20         | <20   | 49    | 138   | 127         | 66    | 153   | 33    | 173            | 121   | 67    | 127   | <20        | 28    | 22    | <20   | <20         | <20   | <20   | <20   | <20         | <20   | 49    | <20   | <20             | <20   | 30    | <20   | <20        | <20   | <20   | <20   |       |       |       |       |       |
| DFTG   | 30              | 75    | 72    | 80    | 138                 | <20   | <20   | <20   | <20         | <20   | <20   | <20   | 26          | 39    | 92    | <20   | 36             | 111   | 89    | 127   | <20        | <20   | <20   | <20   | 36          | <20   | <20   | <20   | 23          | <20   | <20   | <20   | <20             | 61    | <20   | <20   | <20        | <20   | <20   |       |       |       |       |       |       |
| DFWB   | 463             | 347   | 606   | 787   | 1,085               | <20   | <20   | <20   | <20         | <20   | <20   | <20   | <20         | <20   | 21    | 43    | <20            | <20   | <20   | <20   | <20        | <20   | <20   | <20   | <20         | <20   | <20   | <20   | <20         | <20   | <20   | <20   | <20             | <20   | <20   | <20   | <20        | <20   | <20   | <20   | <20   |       |       |       |       |
| 04L    | <20             | 56    | 247   | 334   | 835                 | <20   | <20   | <20   | <20         | <20   | <20   | <20   | <20         | <20   | 34    | <20   | <20            | <20   | <20   | 74    | <20        | <20   | <20   | <20   | <20         | <20   | <20   | <20   | <20         | 48    | <20   | <20   | <20             | <20   | <20   | <20   | <20        | <20   | <20   | <20   |       |       |       |       |       |

**Table S5. Competition Assay Reveals Heterologous Viral Strains to be Neutralized by FP-Directed Plasma Responses, Related Figures 4 and 5.** Animal plasma at end of study or control Abs were tested at a single-point dilution that resulted in >25% neutralization of the corresponding HIV-1 viruses (KER2008.12, Q23.17, 3988.25, BL01.DG, CNE19, 25710-2.43, or BG505.W6M.C2). Plasma and Ab samples were pre-incubated with FP (sequence AVGIGAVFL) or a non-cognate FLAG peptide or control media before mixing with virus. %Neut is the average of 3-5 independent assays with duplicates in each assay. Reduction of neut was calculated as  $(1 - \%Neut[peptide]) / \%Neut[media]$ , i.e. a value of 100% indicates complete inhibition of neutralization, whereas a value of 0% indicates no effect by peptide. Values in Reduction of neut of >30% are highlighted in red.

| Group          | NHP #ID        | Virus        | Plasma dilution or antibody concentration | Media | FP    |                   | FLAG Peptide |                   |     |
|----------------|----------------|--------------|-------------------------------------------|-------|-------|-------------------|--------------|-------------------|-----|
|                |                |              |                                           | %Neut | %Neut | Reduction of Neut | %Neut        | Reduction of Neut |     |
| FP prime       | DFTX           | BG505.W6M.C2 | 20                                        | 75.9  | 64.9  | 15%               | 75.5         | 1%                |     |
|                | DF9L           | 25710-2.43   | 20                                        | 36.4  | 12.2  | 66%               | 38.1         | -5%               |     |
|                | DFIXA          | KER2008.12   | 20                                        | 43.2  | 0.4   | 99%               | 42.4         | 2%                |     |
|                |                | 3988.25      | 20                                        | 27.9  | 0.0   | 100%              | 35.9         | -29%              |     |
|                |                | BL01.DG      | 20                                        | 30.6  | 0.0   | 100%              | 32.9         | -8%               |     |
|                |                | CNE19        | 20                                        | 71.4  | 0.0   | 100%              | 71.5         | 0%                |     |
|                |                | 25710-2.43   | 20                                        | 82.1  | 5.8   | 93%               | 80.9         | 2%                |     |
|                | DFIV           | BG505.W6M.C2 | 20                                        | 52.4  | 30.7  | 41%               | 52.6         | 0%                |     |
|                |                | 3988.25      | 20                                        | 43.7  | 13.9  | 68%               | 45.0         | -3%               |     |
|                |                | 25710-2.43   | 20                                        | 40.4  | 0.5   | 99%               | 38.4         | 5%                |     |
|                | HLP            | BG505.W6M.C2 | 20                                        | 69.0  | 52.3  | 24%               | 70.5         | -2%               |     |
|                |                | 3988.25      | 20                                        | 35.7  | 0.0   | 100%              | 34.3         | 4%                |     |
|                |                | 25710-2.43   | 20                                        | 72.4  | 63.5  | 12%               | 71.3         | 1%                |     |
|                | Cocktail prime | DFL7         | BG505.W6M.C2                              | 20    | 41.4  | 12.1              | 71%          | 44.3              | -7% |
|                |                |              | Q23.17                                    | 20    | 72.6  | 58.6              | 19%          | 72.1              | 1%  |
| 3988.25        |                |              | 20                                        | 32.7  | 13.3  | 59%               | 40.3         | -23%              |     |
| CNE19          |                |              | 20                                        | 55.8  | 21.5  | 62%               | 53.4         | 4%                |     |
| 25710-2.43     |                |              | 20                                        | 71.5  | 21.3  | 70%               | 72.0         | -1%               |     |
| DFTN           |                | BG505.W6M.C2 | 20                                        | 96.6  | 94.5  | 2%                | 96.5         | 0%                |     |
|                |                | CNE19        | 20                                        | 86.9  | 0.0   | 100%              | 87.7         | -1%               |     |
|                |                | 25710-2.43   | 20                                        | 76.1  | 9.3   | 88%               | 77.4         | -2%               |     |
| DFTG           |                | BG505.W6M.C2 | 20                                        | 64.5  | 47.5  | 26%               | 66.4         | -3%               |     |
|                |                | KER2008.12   | 20                                        | 39.5  | 20.3  | 49%               | 42.8         | -8%               |     |
|                |                | Q23.17       | 20                                        | 43.5  | 14.6  | 66%               | 41.7         | 4%                |     |
|                |                | 3988.25      | 20                                        | 43.3  | 29.4  | 32%               | 47.8         | -10%              |     |
|                |                | CNE19        | 20                                        | 54.7  | 12.5  | 77%               | 57.8         | -6%               |     |
|                |                | 25710-2.43   | 20                                        | 63.6  | 17.8  | 72%               | 64.5         | -1%               |     |
|                |                | BG505.W6M.C2 | 20                                        | 74.4  | 66.2  | 11%               | 75.1         | -1%               |     |
| DFWB           | 25710-2.43     | 20           | 40.4                                      | 18.5  | 54%   | 44.1              | -9%          |                   |     |
|                | BG505.W6M.C2   | 20           | 98.9                                      | 97.8  | 1%    | 98.5              | 0%           |                   |     |
|                | KER2008.12     | 20           | 44.3                                      | 21.7  | 51%   | 48.0              | -8%          |                   |     |
| 04L            | 25710-2.43     | 20           | 36.9                                      | 0.1   | 100%  | 40.5              | -10%         |                   |     |
|                | BG505.W6M.C2   | 20           | 99.8                                      | 99.5  | 0%    | 99.5              | 0%           |                   |     |
|                | KER2008.12     | 0.250 ug/mL  | 79.4                                      | 3.0   | 96%   | 80.0              | -1%          |                   |     |
| FP antibody    | VRC34          | Q23.17       | 1.2 ug/mL                                 | 82.2  | 19.1  | 77%               | 82.3         | 0%                |     |
|                |                | 3988.25      | 0.3 ug/mL                                 | 77.4  | 14.8  | 81%               | 77.0         | 0%                |     |
|                |                | BL01.DG      | 0.3 ug/mL                                 | 79.6  | 13.0  | 84%               | 80.4         | -1%               |     |
|                |                | CNE19        | 50 ug/mL                                  | 70.0  | 44.0  | 37%               | 69.8         | 0%                |     |
|                |                | 25710-2.43   | 50 ug/mL                                  | 53.0  | 16.1  | 70%               | 51.9         | 2%                |     |
|                |                | BG505.W6M.C2 | 1.2 ug/mL                                 | 82.4  | 23.7  | 71%               | 81.0         | 2%                |     |
|                |                | KER2008.12   | 2.0 ug/mL                                 | 69.0  | 63.3  | 8%                | 69.4         | 0%                |     |
| CD4bs antibody | VRC01          | Q23.17       | 50 ug/mL                                  | 100.0 | 100.0 | 0%                | 100.0        | 0%                |     |
|                |                | 3988.25      | 1.5 ug/mL                                 | 78.9  | 77.7  | 2%                | 78.2         | 1%                |     |
|                |                | BL01.DG      | 50 ug/mL                                  | 0.0   | 0.1   | -                 | 0.0          | -                 |     |
|                |                | CNE19        | 0.9 ug/mL                                 | 71.4  | 71.0  | 1%                | 71.8         | 0%                |     |
|                |                | 25710-2.43   | 2 ug/mL                                   | 78.4  | 78.4  | 0%                | 78.3         | 0%                |     |
|                |                | BG505.W6M.C2 | 0.21 ug/mL                                | 78.2  | 77.4  | 1%                | 77.7         | 1%                |     |
